1 Title: RNA-Seq reveals early distinctions and late convergence of gene expression  
2 between diapause and quiescence in the Asian tiger mosquito, *Aedes albopictus*

3

4 **Monica F Poelchau<sup>1\*</sup>, Julie A Reynolds<sup>2</sup>, Christine G Elsik<sup>3</sup>, David L Denlinger<sup>2</sup>,**  
5 **Peter A Armbruster<sup>1</sup>**

6

7 <sup>1</sup>Department of Biology, Georgetown University, 37th and O Streets NW, Washington,  
8 DC, USA

9 <sup>2</sup>Department of Entomology, Ohio State University, 318 W 12th Ave., Columbus, Ohio,  
10 USA

11 <sup>3</sup>Divisions of Animal and Plant Sciences, University of Missouri, Columbia, MO, USA

12

13 \* Author for correspondence (mpoelchau@gmail.com).

14

15 Short title: RNA-Seq of *Aedes albopictus* diapause

16

17 Keywords: RNA-Seq, diapause, invasive species, metabolism, quiescence, *Aedes*  
18 *albopictus*

## 19 **Summary**

20 Dormancy is a critical adaptation allowing insects to withstand harsh environmental  
21 conditions. The pre-programmed developmental arrest of diapause is a form of dormancy  
22 that is distinct from quiescence, in which development arrests in immediate response to  
23 hardship. Much progress has been made in understanding the environmental and  
24 hormonal controls of diapause. However, studies identifying transcriptional changes  
25 unique to diapause, rather than quiescence, are lacking, making it difficult to disentangle  
26 the transcriptional profiles of diapause from dormancy in general. The Asian tiger  
27 mosquito, *Aedes albopictus*, presents an ideal model for such a study, as diapausing and  
28 quiescent eggs can be staged and collected for global gene expression profiling using a  
29 newly developed transcriptome. Here, we use RNA-Seq to contrast gene expression  
30 during diapause with quiescence to identify transcriptional changes specific to the  
31 diapause response. We identify global trends in gene expression that show gradual  
32 convergence of diapause gene expression upon gene expression during quiescence.  
33 Functionally, early diapause *Ae. albopictus* show strong expression differences of genes  
34 involved in metabolism, which diminish over time. Of these, only expression of lipid  
35 metabolism genes remained distinct in late diapause. We identify several genes putatively  
36 related to hormonal control of development that are persistently differentially expressed  
37 throughout diapause, suggesting these might be involved in the maintenance of diapause.  
38 Our results identify key biological differences between diapausing and quiescent pharate  
39 larvae, and suggest candidate pathways for studying metabolism and the hormonal  
40 control of development during diapause in other species.

41

## 42 **Introduction**

43 Seasonal transitions require insects to respond to harsh environmental changes in order to  
44 survive. Diapause is an alternative developmental program that is initiated in response to  
45 a token stimulus, often photoperiod, that occurs well in advance of physiologically  
46 limiting environmental factors. Physiological changes during diapause result in  
47 developmental arrest, metabolic restructuring, and stress tolerance, which allows insects  
48 to withstand seasonally occurring environmental insults, such as the harsh conditions of  
49 winter (Tauber and Tauber, 1976). For many insect species, developmental suppression

50 continues after the physiological limitation has been lifted, until specific environmental  
51 changes or endogenous processes lead to diapause termination (Košťál, 2006).

52 Due to the paramount adaptive importance of diapause for insect survival during  
53 seasonal change, there has been a sustained interest in diapause physiology, which has  
54 led to the discovery of many of its environmental and hormonal controls (Denlinger,  
55 2002;Denlinger et al., 2005). However, knowledge of the molecular regulation of  
56 diapause is only beginning to be thoroughly explored, in part because the stage in which  
57 diapause is expressed varies among insects, complicating efforts to identify common  
58 mechanisms of regulation (Denlinger, 2002). Additionally, the traditional model insect of  
59 choice, *Drosophila melanogaster*, has only a weak diapause phenotype (Emerson et al.,  
60 2009;Schmidt et al., 2005;but see Williams et al., 2010), minimizing the utility of this  
61 classical system for research on the molecular basis of diapause. Global gene expression  
62 profiling using microarrays or RNA-Seq is increasingly being applied to “non-model”  
63 insects, that are nonetheless excellent experimental systems for diapause, and has enabled  
64 substantial progress in documenting important transcriptional changes throughout  
65 diapause (Bao and Xu, 2011;Emerson et al., 2010;Poelchau et al., 2013b;Ragland et al.,  
66 2010;Ragland et al., 2011).

67 In contrast to diapause, quiescence is an alternative form of insect dormancy, in  
68 which physiological processes halt in immediate response to the reduction of an  
69 environmental, physiologically limiting factor (Hand and Podrabsky, 2000;Košťál, 2006).  
70 Once the environmental factor returns to non-limiting levels, normal activity is resumed.  
71 Both diapause and quiescence present important adaptations to avoid environmental  
72 exigencies, but there are important distinctions between these two forms of dormancy.  
73 While quiescence occurs in immediate response to an unpredictable environmental  
74 change, diapause is induced in advance of seasonally recurring changes, has an extended  
75 preparatory period, often over more than a generation, and the developmental arrest of  
76 diapause cannot be broken by an external stimulus until diapause has terminated.  
77 Metabolism is depressed in both types of dormancy, but the mode of depression can  
78 differ (Hand and Podrabsky, 2000). Diapausing and quiescent individuals can also have  
79 other important phenotypic differences that likely relate to different strategies of energy  
80 metabolism, such as differences in lipid content, the time interval required for achieving

81 metabolic depression, and desiccation resistance (e.g. Hand and Podrabsky,  
82 2000;Reynolds et al., 2012;Urbanski et al., 2010).

83 Gene expression profiling studies that have sought to identify transcriptional  
84 distinctions of diapause have usually characterized transitions between diapause stages  
85 (i.e., pre-diapause vs. diapause vs. post-diapause) (Bao and Xu, 2011;Emerson et al.,  
86 2010;Ragland et al., 2010;Ragland et al., 2011;but see Reynolds and Hand, 2009b).  
87 These studies have revealed important insights into the degree and mode of metabolic  
88 depression and developmental arrest, and accompanying physiological changes, in  
89 diapausing insects. However, an equally important question is how diapause is  
90 transcriptionally distinct from quiescence, and how this distinction changes throughout  
91 the dynamic progression of diapause (i.e., from early to late stages of developmental  
92 arrest). This comparison may yield alternative insights into the molecular distinctions of  
93 diapause that could be missed in other experimental designs, because two states of  
94 dormancy are being contrasted.

95 The Asian tiger mosquito, *Aedes albopictus* (Skuse), presents an excellent model  
96 system to identify molecular components of diapause. *Ae. albopictus* is a highly invasive  
97 vector species (Benedict et al., 2007) which enters diapause as a pharate larva within the  
98 chorion of the egg (Mori et al., 1981;Wang, 1966). Temperate populations of *Ae.*  
99 *albopictus* undergo a photoperiodic diapause in which a “short-day” photoperiod  
100 experienced during the maternal pupal and adult stages stimulates the production of  
101 offspring destined for diapause. How diapause terminates in *Ae. albopictus* is not clear,  
102 but a certain period of time must elapse before diapause is broken (Pumpuni, 1989, up to  
103 several months, and in our laboratory, ca. 60 days), and this period can be influenced by  
104 temperature and photoperiod (Pumpuni, 1989). Like many other insect species (Hodek,  
105 1996;Tauber et al., 1986), in *Ae. albopictus* diapause termination is followed by a period  
106 of post-diapause quiescence, which ends when environmental conditions that are  
107 favorable for direct development (i.e. immersion in water and high temperatures)  
108 stimulate direct development (i.e. hatching of the pharate larva from the egg). In contrast,  
109 maternal mosquitoes that experience a “long-day” photoperiod oviposit eggs capable of  
110 quiescence: once embryonic development is complete, in the absence of a hatch stimulus  
111 fully developed pharate larvae remain dormant within the eggs. This state of dormancy is

112 distinct from diapause, because quiescent larvae will immediately hatch once the  
113 appropriate stimulus is received (flooding, reviewed in Hawley, 1988). Because the two  
114 types of dormancy are easily induced in *Ae. albopictus*, staged quiescent and diapause  
115 eggs can be easily matched and gene expression compared (Figure 1). Additionally, there  
116 are substantial genomic resources available for expression studies in *Ae. albopictus*:  
117 while as yet there is no genome sequence available, the genome and accompanying  
118 annotations of the closely related *Aedes aegypti* (Nene et al., 2007) provide a powerful  
119 resource for global gene expression studies of *Ae. albopictus* (Poelchau et al.,  
120 2013a; Poelchau et al., 2013b; Poelchau et al., 2011).

121 Here, we identify global gene expression differences between diapausing and  
122 quiescent *Ae. albopictus* at three separate time points representing early, middle, and late  
123 diapause. We find that gene expression patterns converge over time between the two  
124 states of dormancy to a quiescence expression profile. We identify key metabolic  
125 distinctions between diapause and quiescence that are important early in diapause, of  
126 which only differences in lipid metabolism remain throughout the course of diapause.  
127 Finally, we identify several genes with putative hormonal functions that are implicated  
128 throughout diapause, suggesting future avenues of investigation of the hormonal control  
129 of diapause maintenance.

130

## 131 **Materials and methods**

### 132 *Experimental design.*

133 The experimental design (Figure 1), insect rearing and RNA extraction have been  
134 described in a previous paper (Poelchau et al., 2013a). Tissue was generated from a  
135 laboratory F<sub>13</sub> *Ae. albopictus* strain collected from Manassas, VA, USA. Larvae were  
136 reared at 21° C, ca. 80% relative humidity and a 16h light : 8h dark photoperiod until  
137 pupation (see Armbruster and Hutchinson, 2002; Armbruster and Conn, 2006). At  
138 pupation, mosquitoes were transferred to adult cages maintained under either diapause-  
139 inducing, short-day (D; 8 h light: 16 h dark) or non-diapause-inducing, long-day  
140 photoperiod treatment (ND; 16 h light: 8 h dark). We established four separate 9.5 liter  
141 adult cages (biological replicates) for each photoperiod treatment (D, ND) with ca. 100  
142 mosquitoes per cage. Females were blood-fed on a human host 9-16 days after eclosion,

143 and *ca.* 7 and 14 days thereafter. Egg collection to provide pharate larvae for RNA  
144 extraction and diapause measurements began three days after the first bloodfeeding.  
145 Females were allowed to oviposit into a small brown jar lined with unbleached seed  
146 germination paper and half-filled with *ca.* 50 ml dI water, which was placed into each  
147 cage 6-7 hours after lights on. Egg papers were removed and replaced every 24 hours for  
148 twenty-six days. Collected eggs were slowly air-dried on the papers 72 hours after  
149 removal, and kept at 80% relative humidity, a 8 h light: 16 h dark cycle, and 21° C until  
150 further use. We note that diapausing pharate larvae may be more metabolically active at  
151 21° C than at lower temperatures, but that this temperature is still ecologically relevant,  
152 because diapausing pharate larvae spend considerable time at higher temperatures during  
153 the fall before the onset of winter. Additionally, we are able to eliminate confounding  
154 effects of temperature by maintaining pharate larvae from all treatments at the same  
155 temperature. Eggs designated for RNA extraction were snap-frozen in liquid nitrogen and  
156 stored at -80° C at 11 (early diapause), 21 (mid-diapause) or 40 (late diapause or post-  
157 diapause quiescence) days post-oviposition (counted from the start of the oviposition  
158 period). Frozen eggs from each photoperiod, time point and replicate were ground in  
159 TRI® Reagent (Sigma Aldrich, St. Louis, MO, USA), followed by RNA extraction  
160 according to the manufacturer's instructions. DNA was removed using Turbo-DNAfree  
161 (Applied Biosystems/Ambion, Austin, TX, USA). Three biological replicates from each  
162 photoperiod and development stage were chosen from the four available replicates based  
163 on RNA quality and quantity, as measured on an RNA chip (Bioanalyzer 2100, Agilent  
164 Technologies, Santa Clara, CA, USA). Only two biological replicates for 40d pharate  
165 larvae reared on an ND photoperiod were chosen due to low RNA quality in the  
166 remaining replicates. Specific libraries chosen for each time period are listed in  
167 Supplementary Table S1. Incubator malfunction resulted in temperature irregularities for  
168 some 40d eggs (*ca.* 4°C fluctuations on three consecutive days), but we discarded eggs  
169 scheduled for snap-freezing on these days. Furthermore, these temperature fluctuations  
170 should not result in systematic differences in gene expression between ND and D  
171 treatments, because ND and D eggs were stored together and experienced the same  
172 environmental conditions throughout the experiment.

173 For diapause incidence measurements, for each biological replicate, 14-28 day old  
174 eggs were hatched, the number of hatched larvae recorded, and the egg papers with  
175 remaining, un-hatched eggs re-dried. This procedure was repeated twice, after 7 and 14  
176 days. The remaining eggs were bleached (Trpis, 1970) to visualize and record the number  
177 of embryonated but unhatched (diapause) eggs. Diapause incidence (DI) was calculated  
178 as  $DI = (\# \text{ embryonated unhatched eggs}) / (\# \text{ hatched eggs} + \# \text{ embryonated unhatched}$   
179  $\text{eggs})$  (Urbanski et al., 2012). Percent embryonation was calculated as  $(\# \text{ embryonated}$   
180  $\text{unhatched eggs} + \# \text{ hatched eggs}) / \text{total } \# \text{ eggs}$ .

181

### 182 *Sequence assembly and annotation.*

183 Sequencing, assembly and annotation are described in detail in Poelchau et al. 2013a.  
184 Briefly, paired-end, barcoded Illumina mRNA-Seq libraries were constructed from each  
185 of the 17 RNA samples, and a proportion of each library was sequenced on three lanes on  
186 an Illumina HiSeq 2000 sequencer by the University of Maryland Genomics Institute.  
187 Cleaned reads were assembled into contigs after digital normalization (Brown et al.,  
188 2012) using Velvet (Zerbino and Birney, 2008) and Oases (Schulz et al., 2012). Contigs  
189 were then merged with two previous assemblies (Poelchau et al., 2011, Poelchau et al.,  
190 2013b) using a reference-based assembly approach outlined in Poelchau et al. 2013a.  
191 Resulting contigs were annotated based on protein models from *Ae. aegypti*, *Culex*  
192 *quinquefasciatus* (L.), *Anopheles gambiae* (Giles), and *D. melanogaster* (Meigen), and  
193 based on the *Ae. aegypti* genome sequence (Nene et al., 2007). Raw reads are available in  
194 NCBI's short read archive under accession number SRA063587, and the assembly can be  
195 downloaded at <http://www.albopictusexpression.org/?q=data>.

196

### 197 *Gene expression analysis.*

198 Transcriptome assemblies without a genomic reference will generate redundant contigs  
199 for each identified gene model, due in part to allelic variation and/or alternative splicing.  
200 To account for this redundancy in our gene expression calculations, we used the program  
201 RSEM v.1.2.0 (Li and Dewey, 2011) to generate composite gene expression measures for  
202 each identified gene model. We mapped cleaned read pairs to the *Ae. albopictus*  
203 transcriptome using the program's default parameters.



204 Read counts were processed with the program *edgeR* (Robinson and Oshlack,  
205 2010) in the R software environment ([www.r-project.org](http://www.r-project.org)). Only contigs with annotations  
206 to proteins or *Ae. aegypti* genome features based on gene set AaegL1.2 (as opposed to  
207 un-annotated *Ae. aegypti* genome sequence) were used in all subsequent analyses, since  
208 these required functional annotations. Additionally, gene models with fewer than two  
209 counts per million reads across all libraries were removed from the analysis, as these are  
210 not likely to show statistically significant differential expression (cf. Robinson et al.,  
211 2010). Read counts were TMM-normalized (Robinson and Oshlack, 2010), which  
212 accounts for library size and expression bias, and log<sub>2</sub>-fold-change and its significance  
213 was calculated for each gene model between D and ND libraries for each time point (11d,  
214 21d, and 40d pov). We classified a gene as differentially expressed (DE) if its absolute  
215 log<sub>2</sub>-fold-change was greater than 0.5, with a Benjamini-Hochberg corrected  $p < 0.05$ .  
216 Previous RNA-Seq studies performed in our laboratory using the same *Ae. albopictus*  
217 strain, sequencing center and normalization methods show strong congruence with qRT-  
218 PCR results (Poelchau et al. 2013b), and RNA-Seq expression data has repeatedly been  
219 shown to produce accurate gene expression estimates, given proper normalization  
220 (Bullard et al., 2010;Feng et al., 2010;Fu et al., 2009, Poelchau et al., 2013b).  
221 A distance matrix of gene expression patterns (R function *dist*) was summarized using  
222 multi-dimensional scaling (R function *cmdscale*) after transformation for linear modeling  
223 via the function *voom* in *limma* (Smyth, 2004;Smyth, 2005). Standardized expression  
224 patterns of all DE genes were also visualized as Z-scores in heat maps generated by  
225 hierarchical clustering (function *hclust* in R). Variability of gene expression within all D  
226 and ND DE genes, calculated as coefficients of variation (CV), was assessed via a  
227 Wilcoxon signed-rank test. All expression information is available at  
228 <http://www.albopictusexpression.org/?q=data>.

229

230 *Gene ontology and KEGG pathway enrichment analyses.*

231 Global gene expression datasets, such as those derived from RNA-Seq experiments, can  
232 provide insights into changes involving functionally related groups of genes that underlie  
233 specific physiological processes, e.g. Gene Ontology (GO) categories (Ashburner et al.,  
234 2000) or Kegg pathways (Kanehisa and Goto, 2000;Kanehisa et al., 2012). We asked



235 whether these functional groups were over-represented among DE genes at each time  
236 period using the program Goseq, which corrects enrichment analyses for biases arising  
237 from variable transcript lengths in RNA-Seq datasets (Young et al., 2010). We also  
238 performed the same analysis for genes that were DE throughout all three time points in  
239 order to identify functional groups of genes that were differentially expressed throughout  
240 diapause. Generic GO Slim assignments for each gene model were downloaded from  
241 EnsemblMetazoa BioMart (Haider et al., 2009), and Kegg pathway assignments from  
242 <http://www.genome.jp/kegg/> (February 16<sup>th</sup>, 2012). In addition to the suite of GO Slim  
243 categories and Kegg pathways, we manually composed gene lists representative of  
244 pathways or physiological processes with likely relevance for diapause in *Ae. albopictus*  
245 based on gene expression studies from other organisms (following Poelchau et al.,  
246 2013b): insulin signaling, which is instrumental for insect growth and metabolism (cf.  
247 Ragland et al., 2010; Wu and Brown, 2006); ecdysone signaling (from "molting" genes in  
248 Brody, 1999), and heat shock proteins, which are a subset of the gene ontology category  
249 "response to stress" (GO:0006950). Uncorrected p-values from the Goseq analysis were  
250 Benjamini-Hochberg corrected for multiple testing using the *p.adjust* function in *limma*  
251 (Smyth, 2004; Smyth, 2005). Functional groups with corrected p-values < 0.05 and five or  
252 more DE genes were considered significantly enriched.

253

## 254 **Results**

### 255 *Diapause incidence.*

256 Diapause incidence of each biological replicate ranged from 87.5% to 100% in the  
257 diapause-inducing photoperiod treatments, and percent hatch ranged from 77.4% to  
258 82.9% in the non-diapause treatment (Supplementary Material, Table S1; Poelchau et al.,  
259 2013a). Embryonation ranged from 82.9% to 98.9% across all replicates. Diapause  
260 incidence was not 100% for all replicates, indicating that a mixture of mostly diapause,  
261 but some quiescent pharate larvae were sequenced in the D libraries at some time points.  
262 However, this is not likely to generate spurious results, but rather makes our analysis  
263 more conservative, as fewer genes are likely to be detected as DE.

### 264 *Gene expression analysis.*

265 The number of genes that were differentially expressed between D and ND conditions  
266 decreased from early- to mid- to late-diapause (Fig. 2; Table 1). Multi-dimensional  
267 scaling of the gene expression results clustered libraries generally by day post-oviposition  
268 and photoperiod treatment, although one D library at 40d pov clustered with the two ND  
269 libraries (Fig. 3). The first MDS axis appeared to separate libraries by day post-  
270 oviposition (explaining 37.6% of the variation in the data), with the libraries clustering in  
271 chronological order, and tighter clustering occurring between the 21d and 40d libraries.  
272 Also, the 11d D libraries were located towards the “earlier” side of the axis relative to the  
273 11d ND libraries. This is interesting, given previous observations from *Ae. albopictus*  
274 that suggest a developmental delay of embryos during diapause preparation (Poelchau et  
275 al., 2013b). The 21d and 40d libraries, in contrast, show no such temporal separation  
276 between the D and ND treatments. The second axis, which explains 14.1% of the  
277 variation, roughly separated the libraries by photoperiod. Taken together, these results  
278 indicate that gene expression during *Ae. albopictus* quiescence and diapause converges  
279 over time. Normalized read counts, log-fold changes and their p-values, and descriptions  
280 of all genes in the dataset are available in the Supplementary Material, Table S2.

281 We visualized gene expression of all DE genes to identify trends in their  
282 expression convergence over time. Heat maps of standardized expression scores  
283 suggested that change in expression over time is driven by change during diapause, not  
284 quiescence (Fig. 4). To determine whether the decrease in the number of DE genes over  
285 time was driven more by change in ND or D expression, we asked whether the coefficient  
286 of variation (CV) in gene expression across time periods differed between D and ND  
287 genes. D genes had higher CVs that differed significantly from ND genes (paired  
288 Wilcoxon-rank-sum test,  $p < 2.2e-16$ ; mean CV, ND: 0.357, mean CV, D: 0.453),  
289 indicating that gene expression change over time occurs more in D, rather than in ND  
290 pharate larvae.

291 *Gene ontology and KEGG pathway enrichment analyses.*

292 The enrichment analyses overwhelmingly point to differential regulation of metabolic  
293 processes as a key distinction between diapause and quiescence in *Ae. albopictus*. The  
294 number of enriched processes decreased over time, reflecting the decreasing number of  
295 DE genes at each time point (Table 1). In addition, these categories converged in

296 function: the category “lipid metabolism” remained enriched across time periods, and  
297 was the only enriched category remaining at 40d pov. We describe the categories at  
298 individual time points below.

299 A diversity of metabolic processes were enriched for DE genes at 11d pov (Table  
300 1). Several were related to amino acid metabolism, with most genes under-expressed in D  
301 conditions. In contrast, genes involved in carbohydrate metabolism, including pyruvate  
302 metabolism and glycolysis/gluconeogenesis, were primarily over-expressed. Genes  
303 involved in lipid metabolism had mostly higher expression under D conditions, although  
304 the direction of expression was mixed. The category “extracellular region” was mainly  
305 comprised of lipid metabolism genes, and genes that contained chitin-binding domains.  
306 The categories “biological process” and “metabolic pathways” have strong overlap in  
307 gene composition with other categories, and will not be discussed further.

308 At 21d pov, “lipid metabolism” and “extracellular region” were enriched for DE  
309 genes, where genes in “extracellular region” were primarily lipases and genes with chitin-  
310 binding domains. At 40d pov, only “lipid metabolism” remained enriched. Similar to 11d,  
311 gene expression tended to be higher under D conditions for all of these categories at 21d  
312 and 40d pov.

313 Twenty-five genes were DE throughout all three time points (Table 1), and all  
314 were expressed in the same direction continuously. The set of DE genes was enriched for  
315 genes in the category “extracellular region”, which contained two lipases, two triacyl-  
316 glycerol lipases, and one conserved hypothetical protein containing conotoxin domains,  
317 indicating that most of the genes were involved in lipid metabolism. This is consistent  
318 with the enrichment of “lipid metabolism” at all three time points (see above, Table 1).  
319 While not contributing to an enriched category, three genes related to juvenile hormone  
320 binding and metabolism were also DE (a putative juvenile hormone-inducible protein,  
321 AAEL012680, under-expressed in D conditions; an ortholog of juvenile hormone  
322 esterase, AAEL005200, over-expressed; and a gene containing a juvenile hormone  
323 binding protein domain, AAEL000500, over-expressed; Supplementary Material, Table  
324 S3).

325

326 **Discussion**

327 In this study, we contrast gene expression patterns throughout *Ae. albopictus* diapause  
328 and quiescence, two alternative developmental states for pharate first instar larvae, in  
329 order to identify transcriptional regulation of processes relevant to diapause. To our  
330 knowledge, this is the first study to identify global transcriptional components of  
331 diapause maintenance for pharate larval diapause, and the first RNA-Seq study to use  
332 staged comparisons of diapause vs. quiescence to identify diapause-enriched transcripts.  
333 These comparisons allowed us to demonstrate on a global scale how gene expression  
334 patterns during *Ae. albopictus* diapause maintenance reflect biological distinctions of *Ae.*  
335 *albopictus* diapause from quiescence. *Ae. albopictus* eggs are refractory to hatching  
336 stimuli during diapause, yet return to a period of post-diapause quiescence. In turn, *Ae.*  
337 *albopictus* gene expression patterns demonstrate convergence of diapause upon  
338 quiescence over time (Figs 2, 4), rather than achieving a state entirely distinct from  
339 quiescence once diapause is broken. We note that, because diapause was only measured  
340 once for each replicate between 14 and 28d pov, the transcriptional changes between 11d  
341 and 40d could be due to diapause termination leading to post-diapause quiescence in a  
342 proportion of individuals in the diapause group. Previous experiments suggest most eggs  
343 terminate diapause between 30-60d pov under the conditions utilized in this experiment  
344 (unpublished data, Pumpuni 1989). Thus, transcriptional convergence between the  
345 diapause and quiescence profiles could be driven either by transcriptional change during  
346 diapause, and/or by diapause loss itself. However, regardless of the mechanism,  
347 diminishing gene expression differences over time are likely to reflect a physiological  
348 convergence of diapause towards quiescence. This observation supports the model of  
349 diapause as a dynamic process, rather than a static condition (Denlinger, 2002; Košťál,  
350 2006; Tauber et al., 1986).

351 Metabolic gene expression is the main transcriptional distinction between early  
352 diapause and quiescence (Table 1). This general result corroborates findings from many  
353 other gene expression studies of insect diapause, which have documented profound  
354 transcriptional changes related to metabolism in diapausing larvae, pupae, and adult  
355 insects (e.g. Emerson et al., 2010; Ragland et al., 2010; Ragland et al., 2011; Reynolds et  
356 al., 2012); and many other physiological studies that have outlined various mechanisms  
357 of metabolic restructuring during diapause (reviewed in Hahn and Denlinger, 2007; Hahn

358 and Denlinger, 2011;Hand et al., 2011). In general, diapausing animals survive extended  
359 periods of developmental arrest by increasing nutrient stores during diapause preparation,  
360 and reducing metabolism during developmental arrest. How these metabolic changes are  
361 achieved differs among species: Insects vary in the degree that metabolism is suppressed  
362 during diapause (Chaplin and Wells, 1982;Denlinger et al., 1972;Reynolds and Hand,  
363 2009a), and in the specific nutrient compositions that are stored and later utilized,  
364 although energy stores in form of triacylglycerides (Danks, 1987;Hahn and Denlinger,  
365 2007), glycogen (Danks, 1987;Zhou and Miesfeld, 2009), and specialized storage  
366 proteins (Burmester, 1999;Denlinger et al., 2005) are common. Below, we discuss gene  
367 expression changes underlying the metabolism of different types of nutrient stores in  
368 during diapause.

369

#### 370 *Carbohydrate metabolism.*

371 Glycolysis is the first step in generating metabolic energy from glucose. Gluconeogenesis  
372 reverses the glycolytic process, generating glucose from pyruvate, and uses many of the  
373 steps of glycolysis in reverse. Up-regulation of the gluconeogenetic process has been  
374 implicated in previous studies of diapause gene expression (Baker and Russell,  
375 2009;Emerson et al., 2010;Ragland et al., 2010;Ragland et al., 2011), and in a diapause  
376 context is considered consistent with reliance on anaerobic metabolism (Hahn and  
377 Denlinger, 2011). At 11d pov, both the glycolysis/gluconeogenesis pathway and the  
378 pyruvate metabolism pathway were enriched for DE genes, most of which had higher  
379 expression in diapause (Table 1). *Pepck* (AAEL000006, AAEL000080;  
380 phosphoenolpyruvate carboxykinase), which encodes a rate-limiting enzyme in  
381 gluconeogenesis, and a *gapdh* homolog (Glyceraldehyde 3 phosphate dehydrogenase,  
382 AAEL016984) had higher expression under diapausing conditions. These results are  
383 consistent with up-regulation of gluconeogenesis, which suggests a shift towards  
384 anaerobic metabolism. In contrast, *pyk* (pyruvate kinase, AAEL012576, AAEL014913)  
385 also had higher expression, which should indicate reliance on glycolysis, because PyK  
386 converts phosphoenolpyruvate to the end-product of the glycolysis pathway, pyruvate.  
387 However, these results are not necessarily contradictory, as PyK can be inhibited via

388 post-translational modification under fasting conditions (Feliú et al., 1976;Llorente et al.,  
389 1970).

390 In addition to *Ae. albopictus*, a diversity of other organisms show up-regulation of  
391 *pepck* during diapause in gene expression scans, such as *Sarcophaga crassipalpis*,  
392 *Rhagoletis pomonella*, *Wyeomia smithii*, and *C. elegans* (Emerson et al., 2010;McElwee  
393 et al., 2006;Ragland et al., 2010;Ragland et al., 2011), suggesting this enzyme may have  
394 a ubiquitous role in the metabolic restructuring of diapausing animals. In *Ae. albopictus*,  
395 *pepck* expression is high throughout diapause induction (Poelchau et al., 2011),  
396 preparation (Poelchau et al., 2013b), and early diapause. Collectively, our results on  
397 *pepck* suggest a reliance on anaerobic metabolism in preparation for diapause and during  
398 early diapause that exceeds that of quiescent pharate larvae.

399

#### 400 *Amino acid metabolism.*

401 Amino acid metabolic pathways synthesize proteins, hormones, and enzymes; they can  
402 also degrade amino acids to generate metabolic intermediates of glucose to be used in the  
403 citric acid cycle (Klowden, 2007). Amino acids are thought to mediate cold and  
404 desiccation resistance during diapause (e.g. Michaud and Denlinger, 2007) or to play a  
405 role in nutrient storage (Morgan and Chippendale, 1983). Several amino acid metabolic  
406 pathways were enriched at 11d pov, mostly for genes with lower expression under D  
407 conditions (Table 1; Supplementary Material, Table S4). Many of these genes are  
408 involved in glutamine, glycine, and serine metabolism (Supplementary Material, Table  
409 S4). These results suggest a down-regulation of these pathways, which could result in 1)  
410 lower provisioning of the citric acid cycle with metabolic intermediates, consistent with a  
411 shift towards anaerobic metabolism, and 2) higher concentrations of amino acids due to  
412 decreased degradation. Consistent with this interpretation, preliminary metabolomics data  
413 from *Ae. albopictus* show higher levels of amino acids in diapausing vs. non-diapausing  
414 eggs (leucine, serine, threonine, tyrosine, lysine and proline; data not shown). In general,  
415 these data point towards a key role of amino acids in early *Ae. albopictus* diapause that is  
416 consistent with increased anaerobic metabolism and increased cold and desiccation  
417 resistance.

418

419 *Lipid metabolism.*

420 Lipids can serve as a fundamental energy source for diapausing insects, and are the  
421 primary fuel for embryonic development (Arrese and Soulages, 2010; Van Handel, 1993).  
422 Because of their high caloric content and water yield, they store energy more efficiently  
423 than carbohydrate-based sources (Hahn and Denlinger, 2011). Diapausing animals, which  
424 often do not feed and thus must rely on stored nutrients for survival, can be provisioned  
425 with higher lipid reserves, in particular triacylglycerides, than their non-diapause  
426 counterparts (Danks, 1987; Hahn and Denlinger, 2007; McElwee et al., 2006; Tauber et al.,  
427 1986). These stores can then be metabolized during diapause via lipases, which catalyze  
428 the hydrolysis of triacylglycerides, to generate energy. Diapausing 11d pharate larvae  
429 were enriched for lipid metabolism genes (Table 1), especially genes involved in lipid  
430 store mobilization, such as lipases and hydrolases (Supplementary Material, Table S4).  
431 Expression patterns of these genes were mixed; however, the majority of lipases, in  
432 particular the triacylglycerol lipases, were up- rather than down-regulated, suggesting that  
433 diapausing *Ae. albopictus* pharate larvae metabolize lipid stores as an energy source at  
434 this stage. Reliance on lipid stores as an energy source during diapause is consistent with  
435 previous physiological studies of *Ae. albopictus*: 10-14 day old *Ae. albopictus* eggs  
436 contained ~30% more total lipid than quiescent eggs, and pre-diapause embryos showed  
437 expression evidence of lipid storage relative to non-diapause embryos (Reynolds et al.,  
438 2012).

439 Lipid metabolism persisted as a distinct feature of all sampled diapause stages:  
440 lipid metabolism genes were enriched throughout all sampled time periods (Table 1), and  
441 remained primarily over-expressed under diapause conditions. This points to a consistent  
442 role of lipids as an energy store provisioning pharate larvae throughout diapause, relative  
443 to quiescence. Other studies in diapausing insects have indicated different temporal  
444 profiles of lipid metabolism across diapause: for example, in the adult diapause of the  
445 mosquito *Culex pipiens*, lipase expression is low in early diapause, then increases in late  
446 diapause (Sim and Denlinger, 2009). The cotton bollworm *Helicoverpa armigera* also  
447 down-regulates lipase expression in early diapause, presumably to promote lipid storage  
448 for use as an energy source later in diapause (Bao and Xu, 2011). Our data indicate that at  
449 11d pov, lipids are already an important source of energy for diapausing *Ae. albopictus*,



450 suggesting that the relative importance of this energy source is higher than for other  
451 species.

452

453 *Hormone action during diapause maintenance.*

454 Insect hormones play a fundamental role in the control of development (Fraenkel,  
455 1935;Riddiford, 1994;Wigglesworth, 1934) and diapause (Denlinger, 2002). The relative  
456 abundance of two major hormones, ecdysone and juvenile hormone (JH), during  
457 development dictates the developmental progression of the insect (Klowden,  
458 2007;Riddiford, 1994). Changes in the relative and absolute abundance of JH or ecdysone  
459 are known to be important during the initiation, maintenance, and termination of diapause  
460 in many insect species, but the nature of these changes will depend on the life-cycle stage  
461 of diapause developmental arrest (Denlinger, 2002). For example, ecdysteroids play a  
462 regulatory role in the pharate larval diapause of the gypsy moth *Lymantria dispar* (Lee  
463 and Denlinger, 1997;Lee et al., 1997), whereas JH mediates the hormonal control of adult  
464 diapause in *Culex pipiens* (Radio et al., 1999;Spielman, 1974)

465         The mechanisms of hormonal control of pharate larval diapause in *Ae. albopictus*  
466 are unknown. Previous transcriptome analyses of *Ae. albopictus* suggested a role for  
467 ecdysteroid signaling during the preparatory stage of diapause (Poelchau et al.,  
468 2013b;Poelchau et al., 2011). In our analysis of *Ae. albopictus* developmental arrest, we  
469 identified three genes (out of a total of 25) with putative functions related to juvenile  
470 hormone action that had consistent differential expression across all time points  
471 (Supplementary Material, Table S3). This conspicuous pattern would suggest that JH, or  
472 its absence, has a role in the maintenance of *Ae. albopictus* diapause. Endogenous JH  
473 production begins in late embryonic development, and its presence is thought to be  
474 important for dorsal closure, first instar larval cuticle formation, and differentiation of the  
475 midgut (reviewed in Riddiford, 1994). JH continues to be present during larval feeding,  
476 inter-molt, and molting phases, and its titer rises before the molt to the next larval instar.  
477 JH levels can be influenced by the environment: for example, starvation can increase JH  
478 titers (Truman et al., 2006). The JH titer is a function of JH synthesis and degradation.  
479 The enzyme that degrades JH is juvenile hormone esterase (JHE) (Klowden, 2007). A  
480 juvenile hormone esterase homolog (AAEL005200), which has been verified

481 experimentally in *Ae. aegypti* (Bai et al., 2007), was over-expressed under diapausing  
482 conditions, which would suggest it functions to keep JH levels low throughout diapause.  
483 Consistent with this pattern, a putative juvenile-hormone inducible protein  
484 (AAEL012680), which should increase in expression under higher JH levels, was under-  
485 expressed, suggesting lower JH levels in diapausing pharate larvae. In contrast, a gene  
486 containing multiple juvenile hormone binding domains (AAEL000500), which generally  
487 function to transport JH and protect it from degradation by JHEs, was over-expressed.  
488 Therefore, it is difficult to deduce a mode of JH action in the maintenance of diapause in  
489 *Ae. albopictus*. Accordingly, an experiment using adult females reared under short day-  
490 lengths did not show conclusive effects of JH topical application on subsequent hatching  
491 rates (Pumpuni, 1989). However, our data from the pharate larval stage strongly suggest  
492 that further research into JH as a regulatory hormone of diapause maintenance is  
493 worthwhile.

494 An inspection of the “biological process” enriched category revealed a list of 15  
495 members of the cytochrome p450 family (Supplementary Material, Table S4). One of the  
496 diverse functions of the cytochrome P450 family is steroid hormone biosynthesis (Miller,  
497 1988). Four of the cytochrome P450s were DE at both 11d and 21d; and one of these,  
498 *cyp18a1*, encodes an enzyme that inactivates steroid hormones in *D. melanogaster*; loss-  
499 of-function mutations in *D. melanogaster* cause an extended final larval instar and  
500 lethality during metamorphosis (Guittard et al., 2011). *D. melanogaster cyp18a1* is also  
501 homologous to *C. elegans daf-9*, which regulates dauer, larval growth and longevity  
502 (Gerisch et al., 2001). *Cyp18a1* had lower expression in diapausing *Ae. albopictus*  
503 pharate larvae, which is intriguing, given that *daf-9* loss-of-function mutants form  
504 constitutive dauer larvae (Gerisch et al., 2001; Jia et al., 2002). Because of its conspicuous  
505 expression pattern – lower expression during early and mid-diapause, and lack of  
506 differential expression late in diapause – and because of the documented function of  
507 related genes, this gene represents a promising candidate for future studies into the  
508 hormonal regulation of diapause maintenance in *Ae. albopictus*.

509

510 *Stress resistance*

511 Diapausing insects use various mechanisms to tolerate adverse environmental conditions,  
512 such as extreme cold, aridity, and hypoxia (Denlinger, 2002;MacRae, 2010). Heat shock  
513 proteins (Hsps), in particular Hsp70, are often, but not always, up-regulated in diapausing  
514 insects as protection against cold injury (Hayward et al., 2005;Rinehart et al., 2007). For  
515 example, one of the few studies contrasting gene expression during diapause vs. post-  
516 diapause quiescence found that Hsp70 and Hsp23 were up-regulated during *Sarcophaga*  
517 *crassipalpis* diapause (Hayward et al., 2005). Interestingly, this study also found close  
518 parallels between diapause and post-diapause quiescence: expression of these genes  
519 continued at a high level after diapause was broken, but before adult development  
520 resumed. We did not find conspicuous evidence for diapause up-regulation of Hsps in our  
521 analysis of *Ae. albopictus*. This result aligns with findings from other insect species  
522 (Rinehart et al., 2007), such as *Cx. pipiens*, where Hsp70 was not up-regulated in  
523 diapausing adults, despite the fact that diapausing individuals were more cold-tolerant  
524 (Rinehart et al., 2006;Rinehart et al., 2007). These results suggest that other protective  
525 measures against low temperatures, such as amino acid provisioning (see “*Amino acid*  
526 *metabolism*”, above), or synthesis of classic cryoprotectants distinguish *Ae. albopictus*  
527 diapause from quiescence. Finally, several immune-related genes, for example homologs  
528 of a putative cecropin anti-microbial peptide and of Gram-negative binding proteins 3  
529 and 4, were over-expressed at 11d pov (Supplementary Material, Table S4), suggesting  
530 that pathogen defense may be particularly important in early diapausing pharate larvae.  
531 Similarly, several immune-responsive genes had higher expression in diapausing *S.*  
532 *crassipalpis* (Ragland et al., 2010). This suggests that higher investment in pathogen  
533 defense may be a common strategy during insect diapause.

#### 534 *Conclusions*

535 In this study, we use gene expression profiling to gain fundamental insights into the  
536 molecular and physiological distinctions between diapause and quiescence in *Ae.*  
537 *albopictus*. Very little is known about the molecular mechanisms of diapause  
538 maintenance in pharate larval diapause. Because of the increasing importance of *Ae.*  
539 *albopictus* as a disease vector (Benedict et al., 2007), understanding the molecular  
540 regulation of this crucial life history trait could potentially provide a platform for novel  
541 vector control strategies based on the genetic or chemical disruption of diapause. We find

542 gradual convergence of global diapause gene expression patterns towards quiescence.  
543 Metabolic differences, which are the primary distinguishing factor between early  
544 diapause and quiescent gene expression, decline over time to only include small  
545 differences in lipid metabolism, likely the main source of energy for diapausing pharate  
546 larvae. The data also suggest a role for juvenile hormone, and a member of the  
547 cytochrome P450 family, in facilitating diapause maintenance. With our experimental  
548 design, we can effectively characterize diapause as a physiological state distinct from  
549 quiescence, and therefore identify more subtle and likely important components of  
550 diapause that would be missed if compared to actively developing first-instar larvae.

551

### 552 **List of symbols and abbreviations**

553 D: Diapause-inducing photoperiod

554 ND: Non-diapause-inducing photoperiod

555 DE: differentially expressed

556 11d/21d/40d pov: 11 days/21 days/40 days post-oviposition

557 JH: Juvenile hormone

558 JHE: Juvenile hormone esterase

559 Hsp: heat shock protein

560

### 561 **Acknowledgements**

562 We thank the Armbruster, Elsik, and Denlinger labs for helpful comments and  
563 suggestions on this work.

564

### 565 **Funding**

566 This work was supported by the National Institutes of Health grant number  
567 5R21AI081041-02 to P.A.A., C.G.E., and D.L.D.; and Georgetown University.

568

### 569 **References**

570

- 571 **Armbruster, P. A. and Conn, J. E.** (2006). Geographic variation of larval growth in North  
572 American *Aedes albopictus* (Diptera: Culicidae). *Annals of the Entomological Society of America*  
573 **99**, 1234-1243.
- 574 **Armbruster, P. A. and Hutchinson, R. A.** (2002). Pupal mass and wing length as indicators of  
575 fecundity in *Aedes albopictus* and *Aedes geniculatus* (Diptera : Culicidae). *Journal of Medical*  
576 *Entomology* **39**, 699-704.
- 577 **Arrese, E. L. and Soulages, J. L.** (2010). Insect fat body: energy, metabolism, and regulation.  
578 *Annual review of entomology* **55**, 207-225.
- 579 **Ashburner, M., Ball, C. A., Blake, J. A., Botstein, D., Butler, H., Cherry, J. M., Davis, A. P.,**  
580 **Dolinski, K., Dwight, S. S., Eppig, J. T. et al.** (2000). Gene Ontology: tool for the unification of  
581 biology. *Nature Genetics* **25**, 25-29.
- 582 **Bai, H., Ramaseshadri, P. and Palli, S. R.** (2007). Identification and characterization of juvenile  
583 hormone esterase gene from the yellow fever mosquito, *Aedes aegypti*. *Insect Biochemistry and*  
584 *Molecular Biology* **37**, 829-837.
- 585 **Baker, D. and Russell, S.** (2009). Gene expression during *Drosophila melanogaster* egg  
586 development before and after reproductive diapause. *BMC Genomics* **10**, 242.
- 587 **Bao, B. and Xu, W. H.** (2011). Identification of gene expression changes associated with the  
588 initiation of diapause in the brain of the cotton bollworm, *Helicoverpa armigera*. *BMC Genomics*  
589 **12**, 224.
- 590 **Benedict, M. Q., Levine, R. S., Hawley, W. A. and Lounibos, L. P.** (2007). Spread of the tiger:  
591 Global risk of invasion by the mosquito *Aedes albopictus*. *Vector-Borne and Zoonotic Diseases* **7**,  
592 76-85.
- 593 **Brody, T.** (1999). The Interactive Fly: gene networks, development and the Internet. *Trends in*  
594 *Genetics* **15**, 333-334.
- 595 **Brown, C. T., Howe, A., Zhang, Q., Pyrkosz, A. B. and Brom, T. H.** (2012). A reference-free  
596 algorithm for computational normalization of shotgun sequencing data. *arXiv:1203.4802*.

597 **Bullard, J., Purdom, E., Hansen, K. and Dudoit, S.** (2010). Evaluation of statistical methods  
598 for normalization and differential expression in mRNA-Seq experiments. *BMC Bioinformatics*  
599 **11**, 94.

600 **Burmester, T.** (1999). Evolution and function of the insect hexamerins. *European Journal of*  
601 *Entomology* **96**, 213-225.

602 **Chaplin, S. B. and Wells, P. H.** (1982). Energy reserves and metabolic expenditures of monarch  
603 butterflies overwintering in Southern California. *Ecological Entomology* **7**, 249-256.

604 **Danks, H. V.** (1987). *Insect Dormancy: An Ecological Perspective*, pp. 439. Ottawa, Canada:  
605 Biological Survey of Canada (Terrestrial Arthropods).

606 **Denlinger, D. L., Willis, J. H. and Fraenkel, G.** (1972). Rates and cycles of oxygen  
607 consumption during pupal diapause in *Sarcophaga* flesh flies. *Journal of Insect Physiology* **18**,  
608 871-882.

609 **Denlinger, D. L.** (2002). Regulation of diapause. *Annual Review of Entomology* **47**, 93-122.

610 **Denlinger, D. L., Yocum, G. D. and Rinehart, J. L.** (2005). Hormonal control of diapause. In  
611 (ed. L. Gilbert, K. Iatrou and S. Gill), pp. 615-650. Amsterdam: Elsevier Press.

612 **Emerson, K. J., Bradshaw, W. E. and Holzapfel, C. M.** (2010). Microarrays reveal early  
613 transcriptional events during the termination of larval diapause in natural populations of the  
614 mosquito, *Wyeomyia smithii*. *PLoS One* **5**, e9574.

615 **Emerson, K. J., Uyemura, A. M., McDaniel, K. L., Schmidt, P. S., Bradshaw, W. E. and**  
616 **Holzapfel, C. M.** (2009). Environmental control of ovarian dormancy in natural populations of  
617 *Drosophila melanogaster*. *Journal of Comparative Physiology A* **195**, 825-829.

618 **Feliú, J. E., Hue, L. and Hers, H. G.** (1976). Hormonal control of pyruvate kinase activity and  
619 of gluconeogenesis in isolated hepatocytes. *Proceedings of the National Academy of Sciences of*  
620 *the United States of America* **73**, 2762-2766.

- 621 **Feng, L., Liu, H., Liu, Y., Lu, Z., Guo, G., Guo, S., Zheng, H., Gao, Y., Cheng, S., Wang, J.**  
622 **et al.** (2010). Power of deep sequencing and agilent microarray for gene expression profiling  
623 study. *Molecular Biotechnology* **45**, 101-110.
- 624 **Fraenkel, G. S.** (1935). A hormone causing pupation in the blowfly *Calliphora erythrocephala*.  
625 *Proceedings of the Royal Society of London Series B-Biological Sciences* **118**, 1-12.
- 626 **Fu, X., Fu, N., Guo, S., Yan, Z., Xu, Y., Hu, H., Menzel, C., Chen, W., Li, Y., Zeng, R. et al.**  
627 (2009). Estimating accuracy of RNA-Seq and microarrays with proteomics. *BMC Genomics* **10**,  
628 161.
- 629 **Gerisch, B., Weitzel, C., Kober-Eisermann, C., Rottiers, V. and Antebi, A.** (2001). A  
630 hormonal signaling pathway influencing *C. elegans* metabolism, reproductive development, and  
631 life span. *Developmental Cell* **1**, 841-851.
- 632 **Guittard, E., Blais, C., Maria, A., Parvy, J. P., Pasricha, S., Lumb, C., Lafont, R., Daborn,**  
633 **P. J. and Dauphin-Villemant, C.** (2011). CYP18A1, a key enzyme of *Drosophila* steroid  
634 hormone inactivation, is essential for metamorphosis. *Developmental Biology* **349**, 35-45.
- 635 **Hahn, D. A. and Denlinger, D. L.** (2007). Meeting the energetic demands of insect diapause:  
636 Nutrient storage and utilization. *Journal of Insect Physiology* **53**, 760-773.
- 637 **Hahn, D. A. and Denlinger, D. L.** (2011). Energetics of insect diapause. *Annual Review of*  
638 *Entomology* **56**, 103-121.
- 639 **Haider, S., Ballester, B., Smedley, D., Zhang, J. J., Rice, P. and Kasprzyk, A.** (2009).  
640 BioMart Central Portal-unified access to biological data. *Nucleic Acids Research* **37**, W23-W27.
- 641 **Hand, S. C. and Podrabsky, J. E.** (2000). Bioenergetics of diapause and quiescence in aquatic  
642 animals. *Thermochimica Acta* **349**, 31-42.
- 643 **Hand, S. C., Menze, M. A., Borcar, A., Patil, Y., Covi, J. A., Reynolds, J. A. and Toner, M.**  
644 (2011). Metabolic restructuring during energy-limited states: insights from *Artemia franciscana*  
645 and other animals. *Journal of Insect Physiology* **57**, 584-594.



- 646 **Hawley, W. A.** (1988). The biology of *Aedes albopictus*. *Journal of the American Mosquito*  
647 *Control Association* **4**, 1-39.
- 648 **Hayward, S. A. L., Pavlides, S. C., Tammariello, S. P., Rinehart, J. P. and Denlinger, D. L.**  
649 (2005). Temporal expression patterns of diapause-associated genes in flesh fly pupae from the  
650 onset of diapause through post-diapause quiescence. *Journal of Insect Physiology* **51**, 631-640.
- 651 **Hodek, I.** (1996). Diapause development, diapause termination and the end of diapause.  
652 *European Journal of Entomology* **93**, 475-487.
- 653 **Jia, K., Albert, P. S. and Riddle, D. L.** (2002). DAF-9, a cytochrome P450 regulating *C.*  
654 *elegans* larval development and adult longevity. *Development* **129**, 221-231.
- 655 **Kanehisa, M. and Goto, S.** (2000). KEGG: Kyoto Encyclopedia of Genes and Genomes. *Nucleic*  
656 *Acids Research* **28**, 27-30.
- 657 **Kanehisa, M., Goto, S., Sato, Y., Furumichi, M. and Tanabe, M.** (2012). KEGG for  
658 integration and interpretation of large-scale molecular data sets. *Nucleic Acids Research* **40**,  
659 D109-D114.
- 660 **Klowden, M. J.** (2007). *Physiological systems in insects*, pp. 688. Burlington, MA, USA:  
661 Academic Press.
- 662 **Košťál, V.** (2006). Eco-physiological phases of insect diapause. *Journal of Insect Physiology* **52**,  
663 113-127.
- 664 **Lee, K. Y. and Denlinger, D. L.** (1997). A role for ecdysteroids in the induction and  
665 maintenance of the pharate first instar diapause of the gypsy moth, *Lymantria dispar*. *Journal of*  
666 *Insect Physiology* **43**, 289-296.
- 667 **Lee, K. Y., Valaitis, A. P. and Denlinger, D. L.** (1997). Further evidence that diapause in the  
668 gypsy moth, *Lymantria dispar*, is regulated by ecdysteroids: a comparison of diapause and  
669 nondiapause strains. *Journal of Insect Physiology* **43**, 897-903.
- 670 **Li, B. and Dewey, C.** (2011). RSEM: accurate transcript quantification from RNA-Seq data with  
671 or without a reference genome. *BMC Bioinformatics* **12**, 323.

- 672 **Llorente, P., Marco, R. and Sols, A.** (1970). Regulation of liver pyruvate kinase and the  
673 phosphoenolpyruvate crossroads. *European Journal of Biochemistry* **13**, 45-54.
- 674 **MacRae, T. H.** (2010). Gene expression, metabolic regulation and stress tolerance during  
675 diapause. *Cellular and Molecular Life Sciences* **67**, 2405-2424.
- 676 **McElwee, J. J., Schuster, E., Blanc, E., Thornton, J. and Gems, D.** (2006). Diapause-  
677 associated metabolic traits reiterated in long-lived daf-2 mutants in the nematode *Caenorhabditis*  
678 *elegans*. *Mechanisms of Ageing and Development* **127**, 458-472.
- 679 **Michaud, M. R. and Denlinger, D. L.** (2007). Shifts in the carbohydrate, polyol, and amino acid  
680 pools during rapid cold-hardening and diapause-associated cold-hardening in flesh flies  
681 (*Sarcophaga crassipalpis*): a metabolomic comparison. *Journal of Comparative Physiology B-*  
682 *Biochemical Systemic and Environmental Physiology* **177**, 753-763.
- 683 **Miller, W. L.** (1988). Molecular biology of steroid hormone synthesis. *Endocrine Reviews* **9**,  
684 295-318.
- 685 **Morgan, T. D. and Chippendale, G. M.** (1983). Free amino acids of the hemolymph of the  
686 Southwestern corn borer and the European corn borer in relation to their diapause. *Journal of*  
687 *Insect Physiology* **29**, 735-740.
- 688 **Mori, A., Oda, T. and Wada, Y.** (1981). Studies on the egg diapause and overwintering of  
689 *Aedes albopictus* in Nagasaki. *Tropical Medicine* **23**, 79-90.
- 690 **Nene, V., Wortman, J. R., Lawson, D., Haas, B., Kodira, C., Tu, Z., Loftus, B., Xi, Z., Megy,**  
691 **K., Grabherr, M. et al.** (2007). Genome sequence of *Aedes aegypti*, a major arbovirus vector.  
692 *Science* **316**, 1718-1723.
- 693 **Poelchau, M. F., Reynolds, J. A., Elsik, C. G., Denlinger, D. L. and Armbruster, P. A.**  
694 (2013a). Transcriptome sequencing as a platform to elucidate molecular components of the  
695 diapause response in *Aedes albopictus*. *Physiological Entomology* **38**, 173-181.
- 696 **Poelchau, M. F., Reynolds, J. A., Elsik, C. G., Denlinger, D. L. and Armbruster, P. A.**  
697 (2013b). Deep sequencing reveals complex mechanisms of diapause preparation in the invasive

698 mosquito, *Aedes albopictus*. *Proceedings of the Royal Society B: Biological Sciences* **280**,  
699 20130143.

700 **Poelchau, M. F., Reynolds, J. A., Denlinger, D. L., Elsik, C. G. and Armbruster, P. A.**  
701 (2011). A de novo transcriptome of the Asian tiger mosquito, *Aedes albopictus*, to identify  
702 candidate transcripts for diapause preparation. *BMC Genomics* **12**, 619.

703 **Pumpuni, C. B.** (1989). Factors influencing photoperiodic control of egg diapause in *Aedes*  
704 *albopictus* (Skuse). *Department of Biological Sciences, University of Notre Dame*.

705 **Ragland, G. J., Denlinger, D. L. and Hahn, D. A.** (2010). Mechanisms of suspended animation  
706 are revealed by transcript profiling of diapause in the flesh fly. *Proceedings of the National*  
707 *Academy of Sciences of the United States of America* **107**, 14909-14914.

708 **Ragland, G. J., Egan, S. P., Feder, J. L., Berlocher, S. H. and Hahn, D. A.** (2011).  
709 Developmental trajectories of gene expression reveal candidates for diapause termination: a key  
710 life-history transition in the apple maggot fly *Rhagoletis pomonella*. *Journal of Experimental*  
711 *Biology* **214**, 3948-3959.

712 **Radio, J., Chen, M. H. and Meola, R.** (1999). Juvenile hormone biosynthesis in diapausing  
713 and nondiapausing *Culex pipiens* (Diptera : Culicidae). *Journal of Medical Entomology* **36**, 355-  
714 360.

715 **Reynolds, J. A. and Hand, S. C.** (2009a). Decoupling development and energy flow during  
716 embryonic diapause in the cricket, *Allonemobius socius*. *Journal of Experimental Biology* **212**,  
717 2065-2074.

718 **Reynolds, J. A. and Hand, S. C.** (2009b). Embryonic diapause highlighted by differential  
719 expression of mRNAs for ecdysteroidogenesis, transcription and lipid sparing in the cricket  
720 *Allonemobius socius*. *Journal of Experimental Biology* **212**, 2074-2083.

721 **Reynolds, J. A., Poelchau, M. F., Rahman, Z., Armbruster, P. A. and Denlinger, D. L.**  
722 (2012). Transcript profiling reveals mechanisms for lipid conservation during diapause in the  
723 mosquito, *Aedes albopictus*. *Journal of Insect Physiology* **58**, 966-973.

724 **Riddiford, L. M.** (1994). Cellular and molecular actions of juvenile hormone. 1. General  
725 considerations and premetamorphic actions. In *Advances in Insect Physiology*, pp. 213-274. San  
726 Diego, CA, USA: Academic Press.

727 **Rinehart, J. P., Robich, R. M. and Denlinger, D. L.** (2006). Enhanced cold and desiccation  
728 tolerance in diapausing adults of *Culex pipiens*, and a role for Hsp70 in response to cold shock  
729 but not as a component of the diapause program. *Journal of Medical Entomology* **43**, 713-722.

730 **Rinehart, J. P., Li, A., Yocum, G. D., Robich, R. M., Hayward, S. and Denlinger, D. L.**  
731 (2007). Up-regulation of heat shock proteins is essential for cold survival during insect diapause.  
732 *Proceedings of the National Academy of Sciences of the United States of America* **104**, 11130-  
733 11137.

734 **Robinson, M. D., McCarthy, D. J. and Smyth, G. K.** (2010). edgeR: a Bioconductor package  
735 for differential expression analysis of digital gene expression data. *Bioinformatics* **26**, 139-140.

736 **Robinson, M. D. and Oshlack, A.** (2010). A scaling normalization method for differential  
737 expression analysis of RNA-seq data. *Genome Biology* **11**, R25.

738 **Schmidt, P. S., Matzkin, L., Ippolito, M. and Eanes, W. F.** (2005). Geographic variation in  
739 diapause incidence, life-history traits, and climatic adaptation in *Drosophila melanogaster*.  
740 *Evolution* **59**, 1721-1732.

741 **Schulz, M. H., Zerbino, D. R., Vingron, M. and Birney, E.** (2012). Oases: Robust de novo  
742 RNA-seq assembly across the dynamic range of expression levels. *Bioinformatics* **28**, 1086-1092.

743 **Sim, C. and Denlinger, D. L.** (2009). Transcription profiling and regulation of fat metabolism  
744 genes in diapausing adults of the mosquito *Culex pipiens*. *Physiological Genomics* **39**, 202-209.

745 **Smyth, G. K.** (2004). Linear models and empirical Bayes methods for assessing differential  
746 expression in microarray experiments. *Statistical Applications in Genetics and Molecular Biology*  
747 **3**, 3.

748 **Smyth, G. K.** (2005). Limma: linear models for microarray data. In *Bioinformatics and*  
749 *Computational Biology Solutions using R and Bioconductor*. (ed. R. Gentleman, V. Carey, S.  
750 Dudoit, R. Irizarry and W. Huber), pp. 397-420. New York: Springer.

751 **Spielman, A.** (1974). Effect of synthetic juvenile hormone on ovarian diapause of *Culex pipiens*  
752 mosquitoes. *Journal of Medical Entomology* **11**, 223-225.

753 **Tauber, M. J. and Tauber, C. A.** (1976). Insect seasonality: diapause maintenance, termination,  
754 and postdiapause development. *Annual Review of Entomology* **21**, 81-107.

755 **Tauber, M. J., Tauber, C. A. and Masaki, S.** (1986). *Seasonal adaptations of insects*. New  
756 York: Oxford University Press.

757 **Trpis, M.** (1970). A new bleaching and decalcifying method for general use in zoology.  
758 *Canadian Journal of Zoology* **48**, 892-893.

759 **Truman, J. W., Hiruma, K., Allee, J. P., MacWhinnie, S. G., Champlin, D. T. and**  
760 **Riddiford, L. M.** (2006). Juvenile hormone is required to couple imaginal disc formation with  
761 nutrition in insects. *Science* **312**, 1385-1388.

762 **Urbanski, J. M., Benoit, J. B., Michaud, M. R., Denlinger, D. L. and Armbruster, P. A.**  
763 (2010). The molecular physiology of increased egg desiccation resistance during diapause in the  
764 invasive mosquito, *Aedes albopictus*. *Proceedings of the Royal Society B-Biological Sciences*  
765 **277**, 2683-2692.

766 **Urbanski, J. M., Mogi, M., O'Donnell, D. L., DeCotiis, M., Toma, T. and Armbruster, P. A.**  
767 (2012). Rapid adaptive evolution of photoperiodic response during invasion and range expansion  
768 across a climatic gradient. *American Naturalist* **179**, 490-500.

769 **Van Handel, E.** (1993). Fuel metabolism of the mosquito *Culex quinquefasciatus* embryo.  
770 *Journal of Insect Physiology* **39**, 831-833.

771 **Wang, R. L.** (1966). Observations on the influence of photoperiod on egg diapause in *Aedes*  
772 *albopictus* Skuse. *Acta Entomologica Sinica* **15**, 75-77.

773 **Wigglesworth, V. B.** (1934). The physiology of ecdysis in *Rhodnius prolixus*. II. Factors  
774 controlling moulting and metamorphosis. *Quarterly Journal of Microscopical Science* **77**, 191-  
775 222.

776 **Williams, K. D., Schmidt, P. S. and Sokolowski, M. B.** (2010). Photoperiodism in insects:  
777 Molecular basis and consequences of diapause. In *Photoperiodism: The Biological Calender* (ed.  
778 R. J. Nelson, D. L. Denlinger and D. E. Somers), pp. 287-317. New York, NY: Oxford University  
779 Press.

780 **Wu, Q. and Brown, M. R.** (2006). Signaling and function of insulin-like peptides in insects.  
781 *Annual Review of Entomology* **51**, 1-24.

782 **Young, M. D., Wakefield, M. J., Smyth, G. K. and Oshlack, A.** (2010). Gene ontology  
783 analysis for RNA-seq: accounting for selection bias. *Genome Biology* **11**, R14.

784 **Zerbino, D. R. and Birney, E.** (2008). Velvet: Algorithms for de novo short read assembly using  
785 de Bruijn graphs. *Genome Research* **18**, 821-829.

786 **Zhou, G. and Miesfeld, R. L.** (2009). Energy metabolism during diapause in *Culex pipiens*  
787 mosquitoes. *Journal of Insect Physiology* **55**, 40-46.

788  
789 **Figure legends**

790

791 **Figure 1.** Illustration of the experimental design in the context of *Ae. albopictus* diapause  
792 development. Areas shaded in grey refer to the stages used in the experimental design.  
793 11d, 21d and 40d refer to the embryo collection dates of 11 days, 21 days, and 40 days  
794 post-oviposition.

795

796 **Figure 2.** Log-fold-change expression versus log abundance of TMM-normalized gene  
797 expression at 11 days, 21 days, and 40 days post-oviposition. Each point represents an  
798 individual gene. Genes with higher expression under diapausing (D) conditions have  
799 positive fold-change values, and genes with higher expression under non-diapausing

800 (ND) conditions have negative fold-change values. Genes that qualified as significantly  
801 differentially expressed (corrected  $p < 0.05$ ; absolute  $\log_2$ -fold-change  $> 0.5$ ) are in red,  
802 and genes that significantly differentially expressed, but are only expressed in one of the  
803 two conditions are in orange.

804

805 **Figure 3.** Multi-dimensional scaling plot representing distances between expression  
806 profiles of each library across photoperiod treatments and development times (see text for  
807 details). D and ND represent diapause-inducing photoperiods and non-diapause-inducing  
808 photoperiods, respectively; 11d, 21d, and 40d stand for pharate larval collection at 11, 21,  
809 or 40 days post-oviposition.

810

811 **Figure 4.** Heat maps of *Ae. albopictus* differentially expressed genes at 11 days (11d), 21  
812 days (21d) and 40 days (40d) post-oviposition from 1<sup>st</sup> instar larvae generated from  
813 females reared under D (diapause-inducing) and ND (non-diapause-inducing)  
814 photoperiods. Expression values are depicted as Z-standardized scores for each gene,  
815 where blue represents low expression, and yellow, high.



## Tables

| Time period   | Category ID | Category name                               | No. genes under-expressed | No. genes over-expressed | Functional group         |
|---------------|-------------|---------------------------------------------|---------------------------|--------------------------|--------------------------|
| 11d           | path00250   | Alanine, aspartate and glutamate metabolism | 6                         | 0                        | amino acid metabolism    |
| 11d           | GO:0006520  | cellular amino acid metabolic process       | 9                         | 3                        | amino acid metabolism    |
| 11d           | path00260   | Glycine, serine and threonine metabolism    | 6                         | 1                        | amino acid metabolism    |
| 11d           | GO:0005975  | carbohydrate metabolic process              | 6                         | 24                       | carbohydrate metabolism  |
| 11d           | path00010   | Glycolysis / Gluconeogenesis                | 0                         | 6                        | carbohydrate metabolism  |
| 11d           | path00620   | Pyruvate metabolism                         | 1                         | 6                        | carbohydrate metabolism  |
| 11d           | GO:0008150  | biological_process                          | 89                        | 120                      | general                  |
| 11d           | GO:0006629  | lipid metabolic process                     | 8                         | 9                        | lipid metabolism         |
| 11d           | GO:0005576  | extracellular region                        | 5                         | 25                       | lipid metabolism/cuticle |
| 11d           | path01100   | Metabolic pathways                          | 23                        | 21                       | metabolism               |
| 11d           | NA          | all DE genes                                | 152                       | 231                      | NA                       |
| 21d           | GO:0005576  | extracellular region                        | 3                         | 6                        | lipid metabolism/cuticle |
| 21d           | GO:0006629  | lipid metabolic process                     | 4                         | 6                        | lipid metabolism         |
| 21d           | NA          | all DE genes                                | 62                        | 54                       | NA                       |
| 40d           | GO:0006629  | lipid metabolic process                     | 2                         | 4                        | lipid metabolism         |
| 40d           | NA          | all DE genes                                | 13                        | 22                       | NA                       |
| DE throughout | GO:0005576  | extracellular region                        | 1                         | 4                        | lipid metabolism         |
| DE throughout | NA          | all DE genes                                | 11                        | 14                       | NA                       |

**Table 1.** Functional categories that were significantly enriched for differentially expressed (DE) genes at 11 days, 21 days, and 40 days post-oviposition, as well as groups enriched in genes DE throughout all three time periods (“DE throughout”). Functional groups are Gene Ontology (GO) GO-Slim categories (Ashburner et al., 2000) and Kegg pathways (Kanehisa and Goto, 2000; Kanehisa et al., 2012). Groups with a Benjamini-Hochberg corrected  $p < 0.05$  and five or more DE genes were considered significantly enriched. The direction of gene expression refers to over-expression and under-expression under diapause (D) conditions. Entries under the category name “all DE genes” show all genes that had higher or lower expression under D conditions at 11d, 21d or 40d pov.

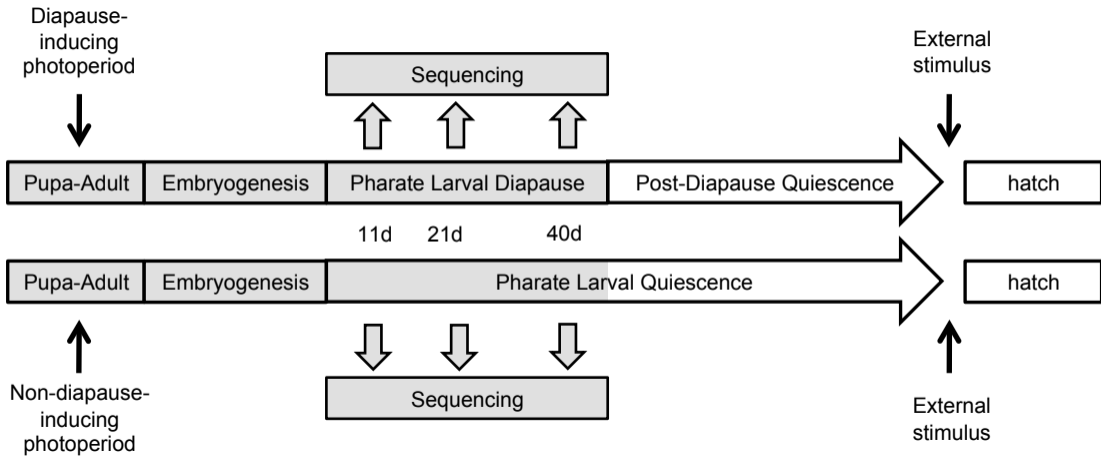

11d post-oviposition

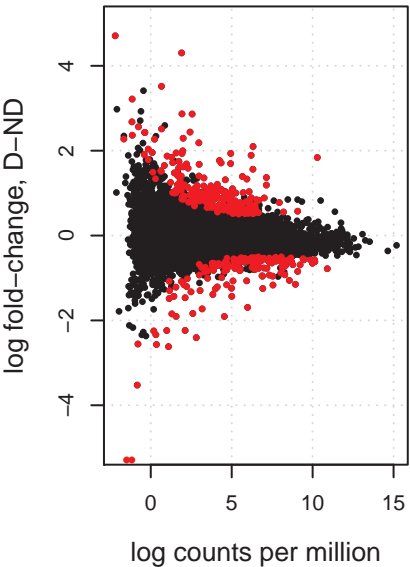

21d post-oviposition

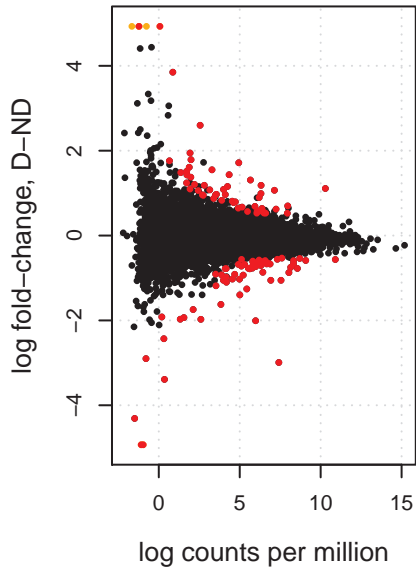

40d post-oviposition

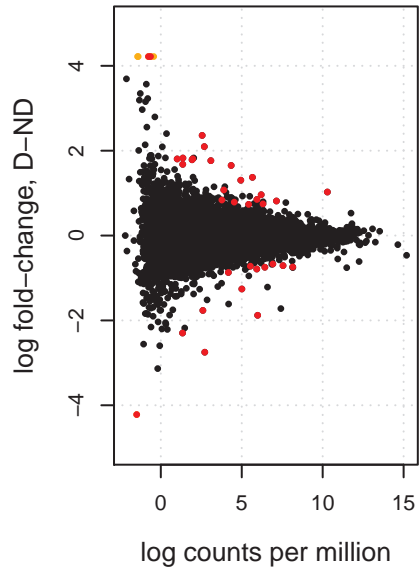

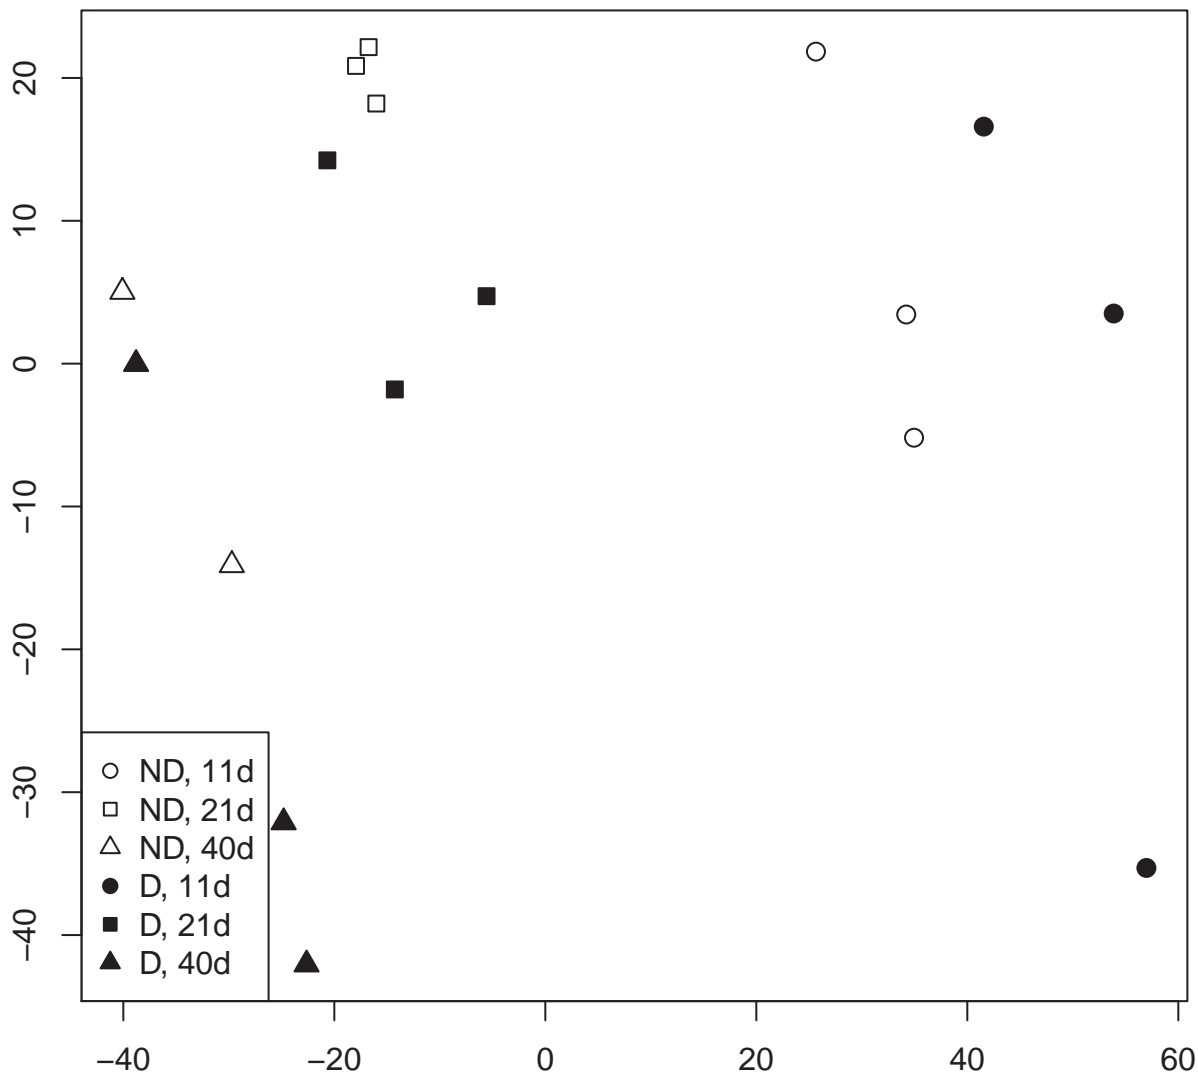

**ND**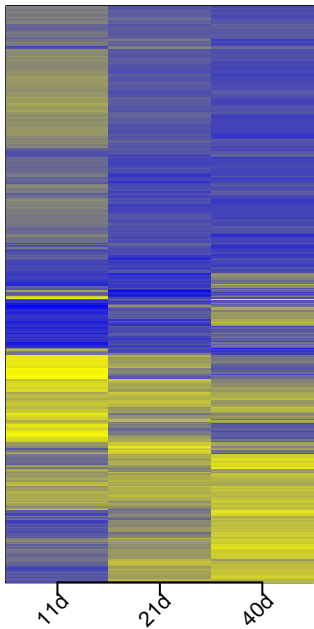**D**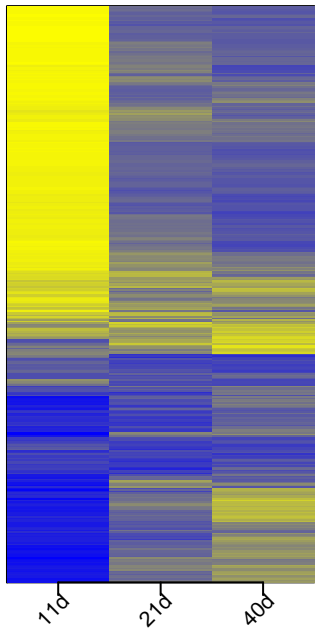

Source: https://cob.silverchair.com/jeb/article-pdf/doi/10.1242/jeb.089508/2036617/jeb_089508.pdf
